# Supplementary material for: Topotactic structural conversion and hydration-dependent thermal expansion in robust LnMIII(CN)6·nH2O and flexible ALnFeII(CN)6·nH2O frameworks (A = Li, Na, K; Ln = La–Lu, Y; M = Co, Fe; 0 ≤ n ≤ 5)
Source: Royal Society of Chemistry journal article supplement (doi:10.1039/c4sc00809j), 2014-06-04
Supplement: c4sc00809j1.pdf [file c4sc00809j1.pdf]

## Supporting Information

### **Topotactic structural conversion and hydration- dependent thermal expansion in robust $\text{LnM}^{\text{III}}(\text{CN})_6 \cdot n\text{H}_2\text{O}$ and flexible $\text{ALnFe}^{\text{II}}(\text{CN})_6 \cdot n\text{H}_2\text{O}$ frameworks (A = Li, Na, K; Ln = La-Lu, Y; M = Co, Fe; $0 \leq n \leq 5$ )**

Samuel G. Duyker,<sup>ab</sup> Gregory J. Halder,<sup>c</sup> Peter D. Southon,<sup>a</sup> David J. Price,<sup>a</sup>  
Alison J. Edwards,<sup>b</sup> Vanessa K. Peterson,<sup>b</sup> Cameron J. Kepert<sup>\*a</sup>

<sup>a</sup> School of Chemistry, The University of Sydney, NSW, Australia.

<sup>b</sup> Australian Nuclear Science and Technology Organisation, Lucas Heights, NSW, Australia.

<sup>c</sup> X-ray Science Division, Argonne National Laboratory, Argonne, Illinois, USA.

\* Corresponding Author: c.kepert@chem.usyd.edu.au.

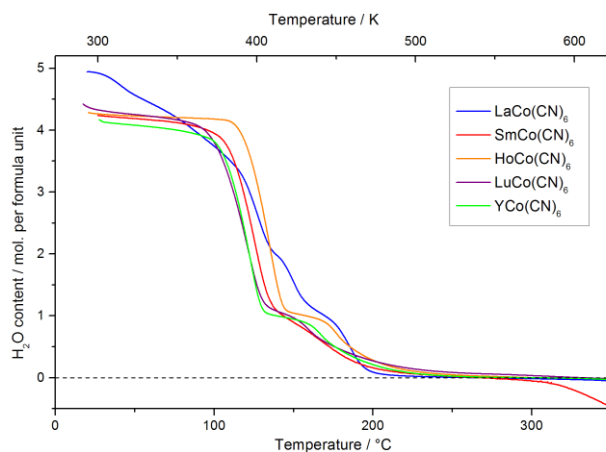

**Figure S1** Thermogravimetrically-determined water content for a selection of  $\text{LnCo}(\text{CN})_6 \cdot n\text{H}_2\text{O}$  compounds ( $\text{Ln} = \text{La}, \text{Sm}, \text{Ho}, \text{Lu}, \text{Y}$ ).

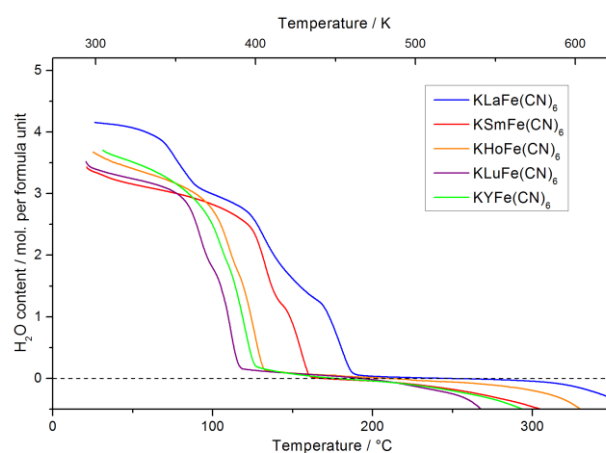

**Figure S2** Thermogravimetrically-determined water content for a selection of  $\text{KLnFe}(\text{CN})_6 \cdot n\text{H}_2\text{O}$  compounds ( $\text{Ln} = \text{La}, \text{Sm}, \text{Ho}, \text{Lu}, \text{Y}$ ). Significant Ln-dependence is observed in the temperature required for full dehydration.

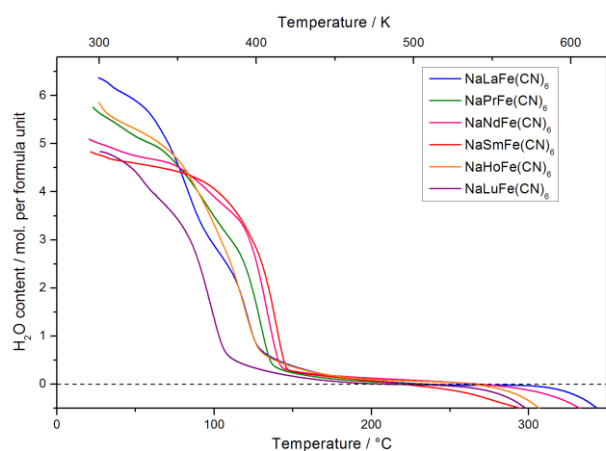

**Figure S3** Thermogravimetrically-determined water content for a selection of  $\text{NaLnFe}(\text{CN})_6 \cdot n\text{H}_2\text{O}$  compounds ( $\text{Ln} = \text{La}, \text{Pr}, \text{Nd}, \text{Sm}, \text{Ho}, \text{Lu}$ ). The calculated water content is higher than expected based on the crystal structures (Figure S7), possibly due to incomplete drying of surface water from the sample prior to measurement.

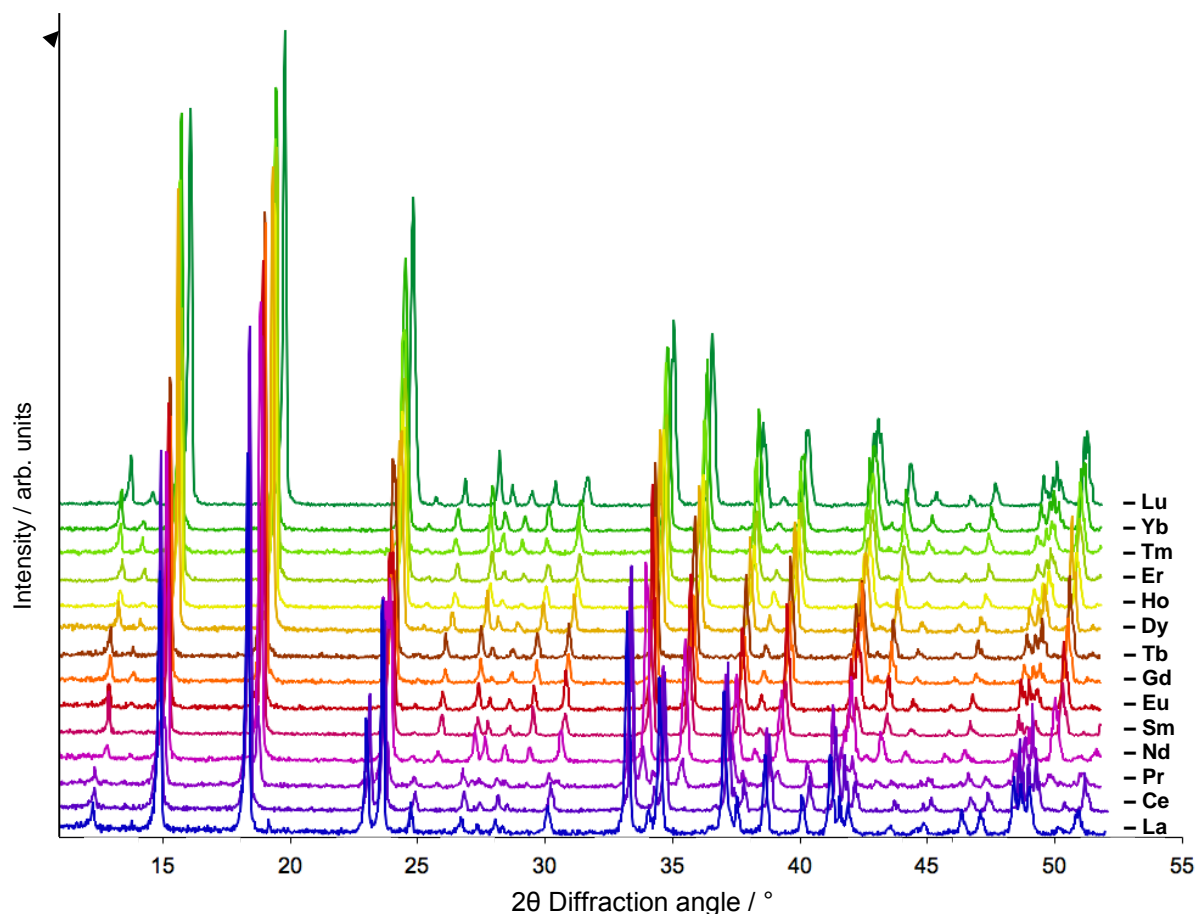

**Figure S4** Laboratory X-ray powder diffraction patterns for the as-synthesised, hydrated  $\text{LnCo}(\text{CN})_6 \cdot n\text{H}_2\text{O}$  series. The transition from hexagonal pentahydrates to orthorhombic tetrahydrates is evident between Pr and Nd.

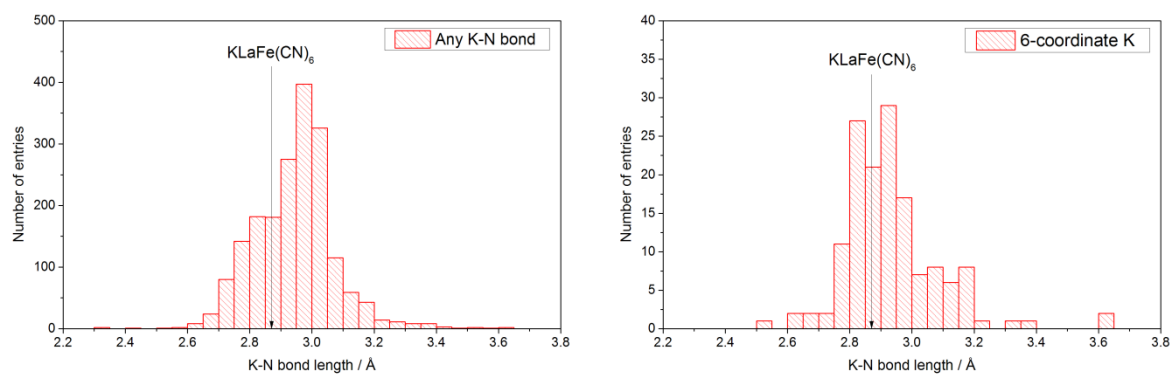

**Figure S5** Average lengths of bonds in the Cambridge Structural Database for a) any K-N bond, and b) K-N bonds for 6-coordinate K. The observed  $\text{K} \cdots \text{N}$  distance in  $\text{KLaFe}(\text{CN})_6$  (2.87 Å, indicated by the arrow) appears to be typical for K interacting with six N atoms, supporting the assertion that this type of interaction is present and is the cause of the structural transformation upon dehydration.

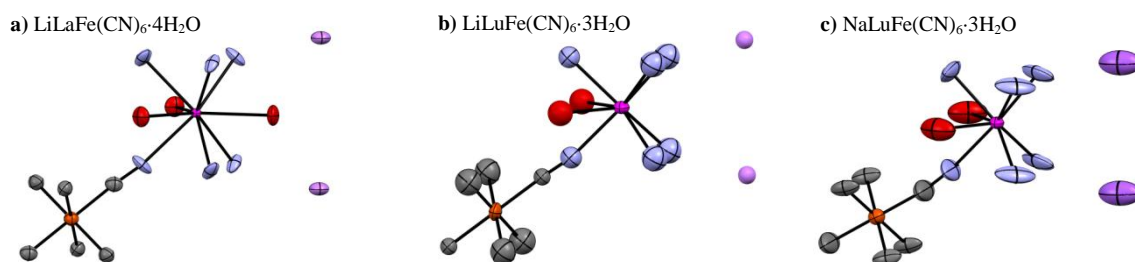

**Figure S6** Structures of a)  $\text{LiLaFe}(\text{CN})_6 \cdot 4\text{H}_2\text{O}$ , b)  $\text{LiLuFe}(\text{CN})_6 \cdot 3\text{H}_2\text{O}$ , and c)  $\text{NaLuFe}(\text{CN})_6 \cdot 3\text{H}_2\text{O}$  determined from SCXRD data. The pink ellipsoids/spheres represent 50:50  $\text{A}^+:\text{O}$  sites. The O atoms and  $\text{Li}^+$  ions in (b) are modelled isotropically.

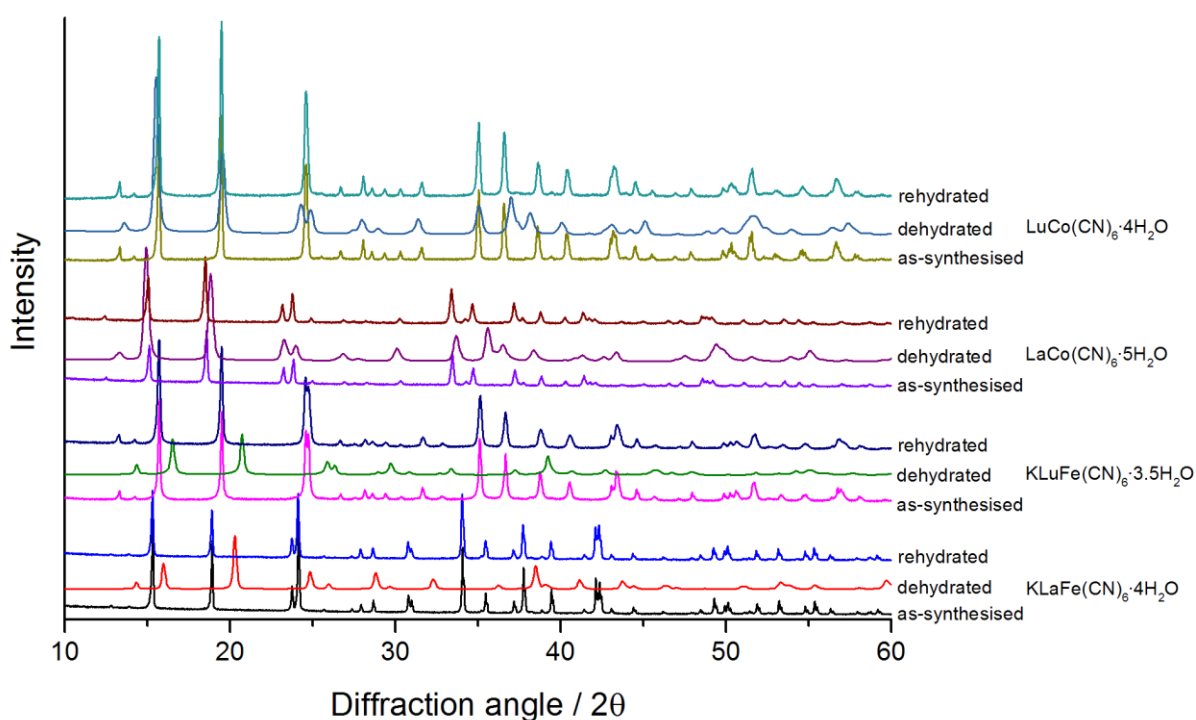

**Figure S7** Laboratory XRPD data for  $\text{A}_3\text{LnM}(\text{CN})_6 \cdot n\text{H}_2\text{O}$  frameworks, with the close similarity of the as-synthesised and rehydrated patterns demonstrating the reversibility of the structural transformations that occur upon dehydration. Synchrotron data (with  $2\theta$  values rescaled to match the  $\text{Cu K}\alpha$  wavelength lab data) for the dehydrated materials are shown for comparison. The large shift of the peaks to higher angles upon dehydration of the  $\text{KLnFe}(\text{CN})_6 \cdot n\text{H}_2\text{O}$  materials is evident, corresponding to the large decrease in volume.

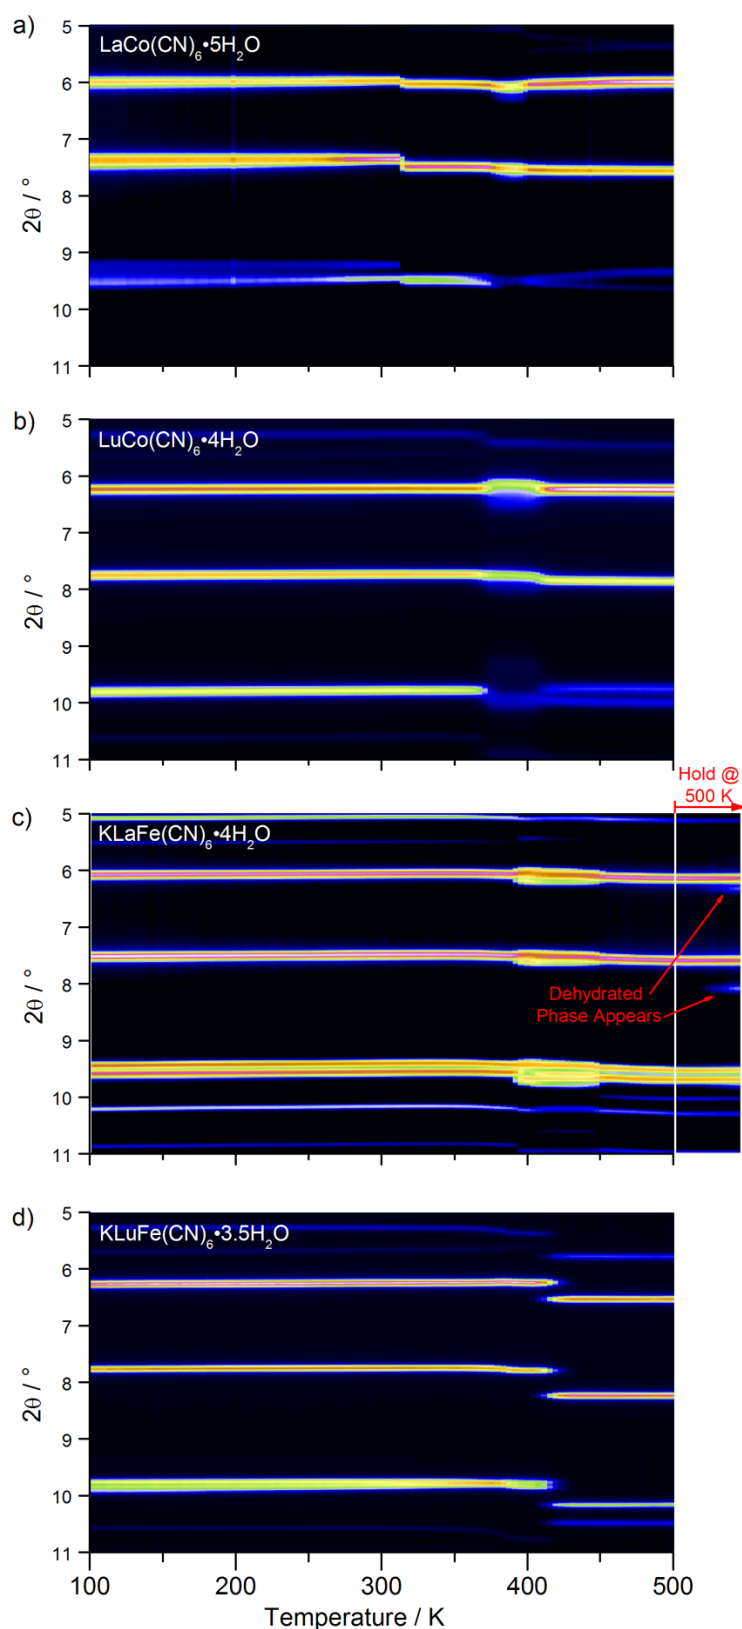

**Figure S8** Selected  $2\theta$  range of the series of VT-XRPD patterns between 100-500 K for the dehydration of (a)  $\text{LaCo(CN)}_6 \cdot 5\text{H}_2\text{O}$  showing two phase changes, (b)  $\text{LuCo(CN)}_6 \cdot 4\text{H}_2\text{O}$  showing the symmetry change from orthorhombic to hexagonal via an un-indexed phase or phase mixture between 370-410 K, (c)  $\text{KLaFe(CN)}_6 \cdot 4\text{H}_2\text{O}$  including data for temperature hold at 500 K, during which the fully dehydrated phase begins to appear, and (d)  $\text{KLuFe(CN)}_6 \cdot 3.5\text{H}_2\text{O}$  with the dehydrated phase appearing in a similar manner at around 400 K. The X-ray wavelength used was 0.61951 Å for (a) & (b) and 0.61832 Å for (c) & (d).

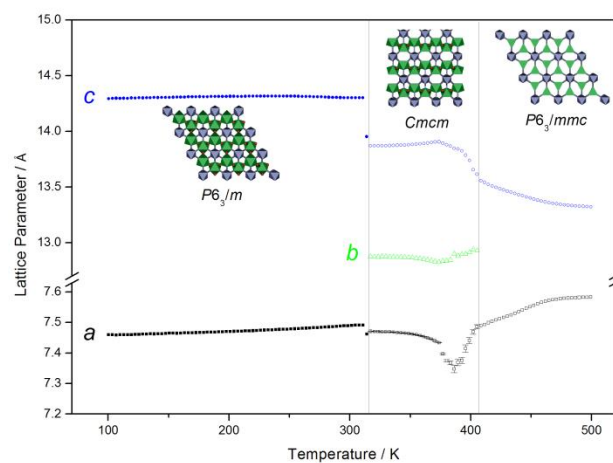

**Figure S9** Unit cell  $a$ ,  $b$ , and  $c$  parameters vs. temperature for  $\text{LaCo(CN)}_6 \cdot n\text{H}_2\text{O}$  during heating, from synchrotron XRPD data.

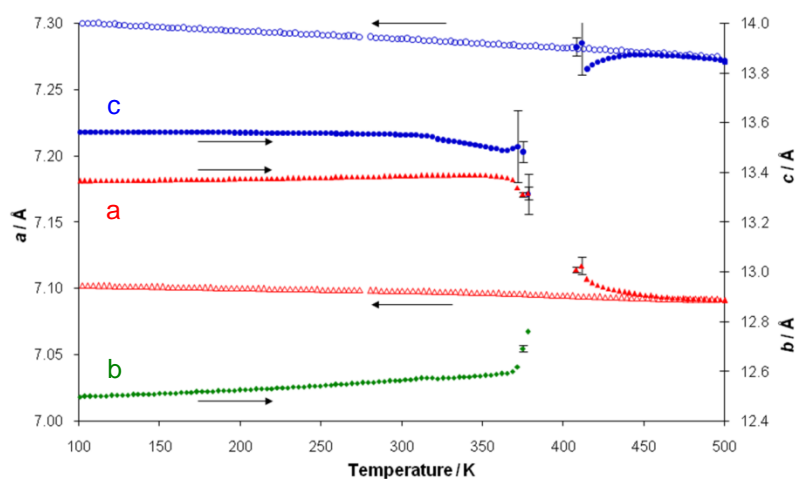

**Figure S10** Unit cell  $a$ ,  $b$ , and  $c$  parameters vs. temperature for  $\text{LuCo(CN)}_6 \cdot n\text{H}_2\text{O}$  from synchrotron XRPD data. Filled symbols represent the hydrated phase ( $Cmcm$ ) during heating; open symbols represent the dehydrated phase ( $P6_3/mmc$ ) during cooling.

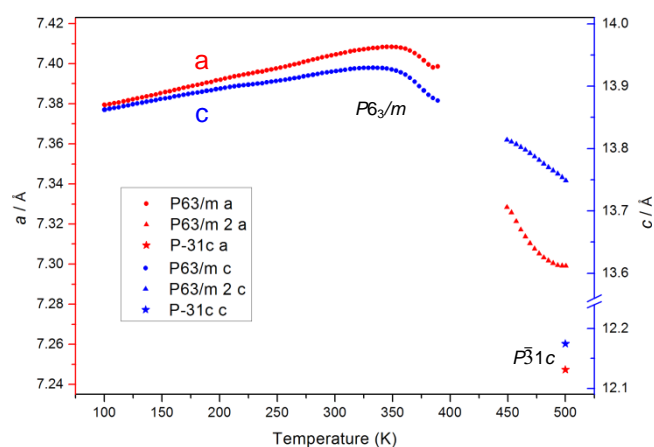

**Figure S11** Unit cell parameters vs. temperature for  $\text{KLaFe(CN)}_6 \cdot 4\text{H}_2\text{O}$  during thermal dehydration.

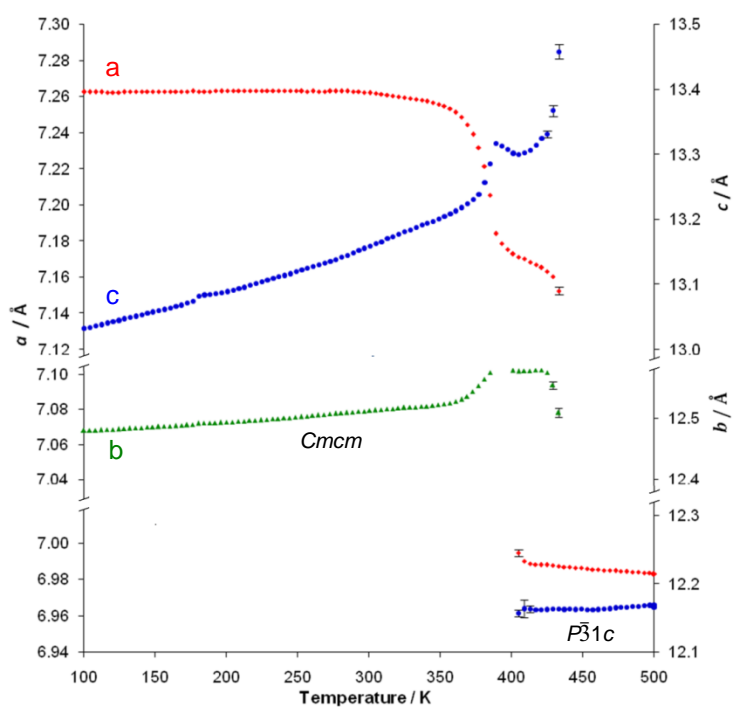

**Figure S12** Unit cell  $a$ ,  $b$ , and  $c$  parameters vs. temperature for  $\text{KLuFe(CN)}_6 \cdot 3.5\text{H}_2\text{O}$  during thermal dehydration.

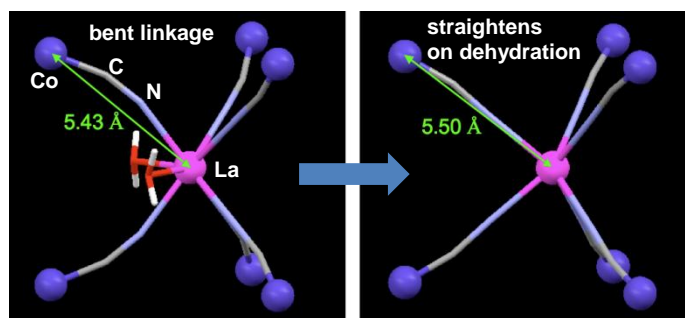

**Figure S13** A portion of the structure from the Rietveld refinements for (a)  $\text{LaCo(CN)}_6 \cdot 4\text{H}_2\text{O}$  with two coordinated water molecules, and (b) dehydrated  $\text{LaCo(CN)}_6$ , highlighting the effect of coordinated water on cyanide bending and Ln-M distance, which may explain in part the slight expansion of the material during the final stage of dehydration.

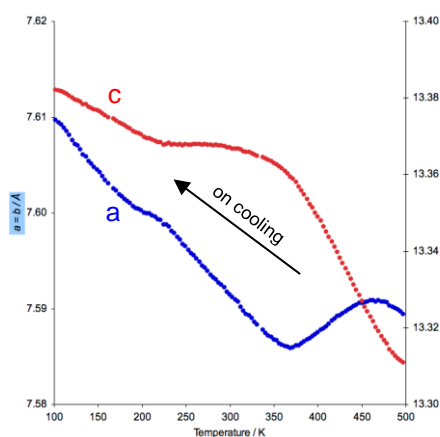

**Figure S14** Unit cell  $a$  and  $c$  parameters for  $\text{LaCo(CN)}_6$  on cooling. The non-linearities arise from undesired re-adsorption of residual water vapour into the extremely hygroscopic framework as the temperature is decreased.

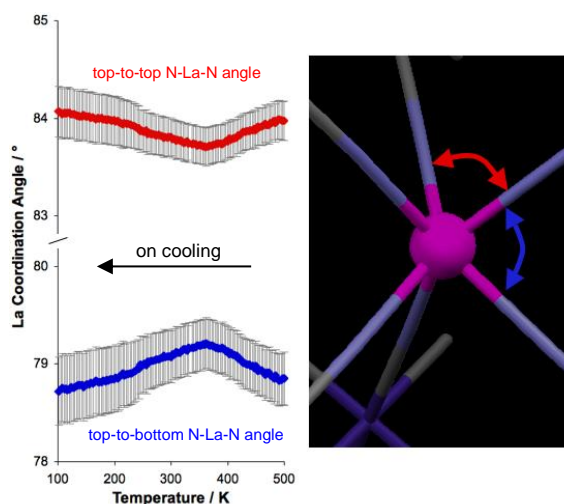

**Figure S15** Coordination angles around the  $\text{LaN}_6$  unit in  $\text{LaCo(CN)}_6$  on cooling, determined by Rietveld refinement against the synchrotron XRPD data. ‘Top-to-top’ (red) and ‘top-to-bottom’ (blue) N-La-N angles are illustrated. The increase in the top-to-bottom angle on cooling from 500 K to 350 K (and concomitant decrease in the top-to-top angle) is a strong indication that water is coordinating at the equatorial coordination site during this period.



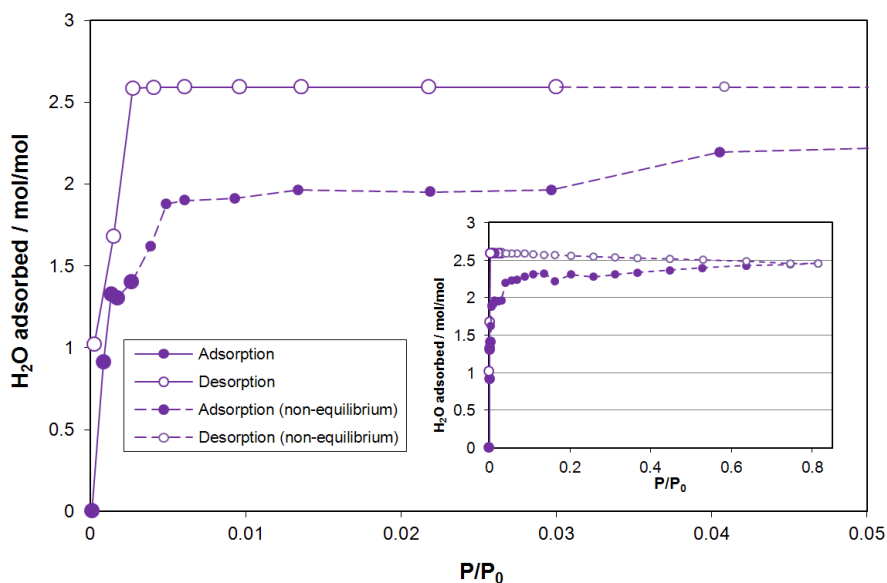

**Figure S16** Low pressure portion of the gravimetric water adsorption (filled circles) and desorption (open circles) isotherms for  $LuCo(CN)_6$  at 40 °C. The full isotherm is inset. The smaller symbols with dashed lines indicate non-equilibrium points. The kinetics of adsorption are very slow beyond the initial adsorption of the two coordinated water molecules. The sample continued to adsorb water vapour over several days even as the pressure was being decreased during the “desorption” phase of the measurement.

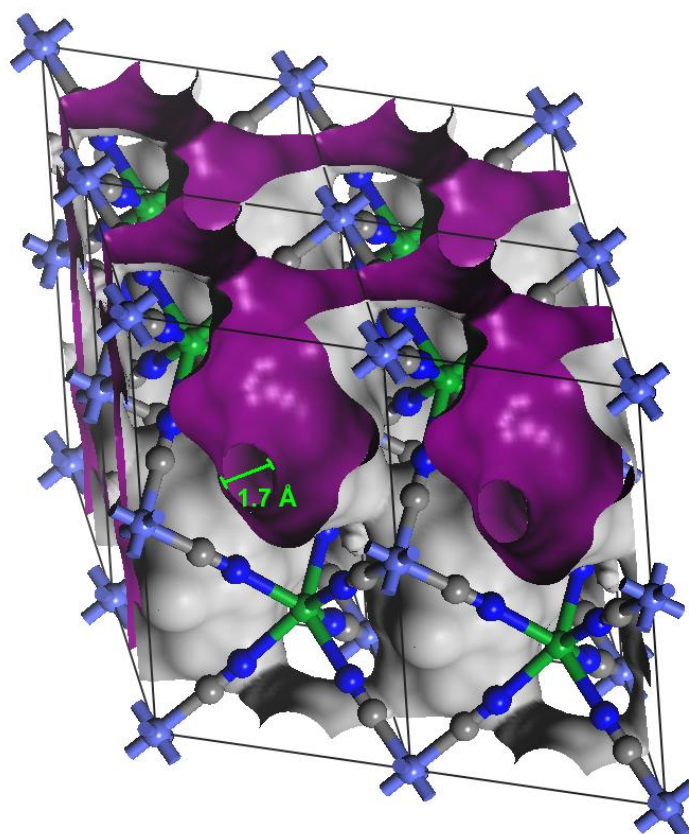

**Figure S17** Pore structure in anhydrous  $LuCo(CN)_6$ , generated in Materials Studio using the Connolly method,<sup>1</sup> with a 1.1 Å probe radius. The narrow circular windows between the larger pore spaces are visible, with a diameter of only ~1.7 Å (or even less if a larger probe radius is used).

[1] M. Connolly, *Science*, 1983, **221**, 709-713.

**Table S1** Lattice parameters and weighted profile R-factors from Rietveld refinement using XRPD data for dehydration of  $\text{LaCo}(\text{CN})_6 \cdot 5\text{H}_2\text{O}$  (12-BM, APS). No shading denotes refinements in  $P6_3/m$ . Light shading denotes refinements in  $Cmcm$ . Dark shading denotes refinements in  $P6_3/mmc$ .

| T / K | $a / \text{\AA}$ | $b / \text{\AA}$ | $c / \text{\AA}$ | $V / \text{\AA}^3$ | wRp    |
|-------|------------------|------------------|------------------|--------------------|--------|
| 100.4 | 7.4596(11)       | $b = a$          | 14.293(4)        | 688.78(22)         | 0.0363 |
| 103.5 | 7.4597(11)       | $b = a$          | 14.295(4)        | 688.88(22)         | 0.0366 |
| 106.6 | 7.4587(13)       | $b = a$          | 14.297(4)        | 688.83(27)         | 0.0429 |
| 109.8 | 7.4593(12)       | $b = a$          | 14.296(4)        | 688.87(24)         | 0.0386 |
| 112.9 | 7.4598(11)       | $b = a$          | 14.297(4)        | 689.02(22)         | 0.0369 |
| 116.1 | 7.4601(11)       | $b = a$          | 14.296(4)        | 689.04(23)         | 0.0370 |
| 119.2 | 7.4601(13)       | $b = a$          | 14.300(4)        | 689.20(26)         | 0.0422 |
| 122.4 | 7.4613(11)       | $b = a$          | 14.299(4)        | 689.38(23)         | 0.0378 |
| 125.5 | 7.4609(12)       | $b = a$          | 14.301(4)        | 689.42(25)         | 0.0412 |
| 128.6 | 7.4619(11)       | $b = a$          | 14.300(4)        | 689.57(22)         | 0.0369 |
| 131.8 | 7.4616(13)       | $b = a$          | 14.302(4)        | 689.60(26)         | 0.0427 |
| 134.9 | 7.4630(11)       | $b = a$          | 14.301(3)        | 689.78(22)         | 0.0365 |
| 138.0 | 7.4624(13)       | $b = a$          | 14.304(4)        | 689.82(26)         | 0.0428 |
| 141.2 | 7.4632(11)       | $b = a$          | 14.303(3)        | 689.93(22)         | 0.0367 |
| 144.3 | 7.4631(12)       | $b = a$          | 14.305(4)        | 690.02(25)         | 0.0422 |
| 147.5 | 7.4639(11)       | $b = a$          | 14.305(3)        | 690.15(21)         | 0.0365 |
| 150.6 | 7.4651(10)       | $b = a$          | 14.305(3)        | 690.40(21)         | 0.0361 |
| 153.8 | 7.4647(10)       | $b = a$          | 14.306(3)        | 690.35(21)         | 0.0359 |
| 156.9 | 7.4644(12)       | $b = a$          | 14.307(4)        | 690.36(24)         | 0.0411 |
| 160.0 | 7.4650(10)       | $b = a$          | 14.307(3)        | 690.45(21)         | 0.0359 |
| 163.2 | 7.4659(10)       | $b = a$          | 14.307(3)        | 690.64(20)         | 0.0358 |
| 166.3 | 7.4656(11)       | $b = a$          | 14.310(4)        | 690.71(23)         | 0.0404 |
| 169.5 | 7.4663(11)       | $b = a$          | 14.310(4)        | 690.83(22)         | 0.0378 |
| 172.6 | 7.4665(11)       | $b = a$          | 14.310(4)        | 690.91(22)         | 0.0380 |
| 175.8 | 7.4669(10)       | $b = a$          | 14.311(3)        | 691.03(21)         | 0.0376 |
| 178.9 | 7.4671(10)       | $b = a$          | 14.311(3)        | 691.05(20)         | 0.0352 |
| 182.0 | 7.4679(10)       | $b = a$          | 14.311(3)        | 691.18(20)         | 0.0348 |
| 185.2 | 7.4682(9)        | $b = a$          | 14.312(3)        | 691.29(19)         | 0.0346 |
| 188.3 | 7.4683(10)       | $b = a$          | 14.313(4)        | 691.37(22)         | 0.0384 |
| 191.5 | 7.4689(9)        | $b = a$          | 14.3127(30)      | 691.47(19)         | 0.0345 |
| 194.6 | 7.4694(9)        | $b = a$          | 14.3125(30)      | 691.53(19)         | 0.0338 |
| 197.7 | 7.4700(9)        | $b = a$          | 14.3135(29)      | 691.69(18)         | 0.0338 |
| 200.9 | 7.4701(9)        | $b = a$          | 14.3139(29)      | 691.73(18)         | 0.0335 |
| 204.0 | 7.4707(9)        | $b = a$          | 14.3141(28)      | 691.86(18)         | 0.0332 |
| 207.2 | 7.4711(8)        | $b = a$          | 14.3135(28)      | 691.91(17)         | 0.0326 |
| 210.4 | 7.4717(8)        | $b = a$          | 14.3137(28)      | 692.02(17)         | 0.0323 |
| 213.5 | 7.4721(8)        | $b = a$          | 14.3143(27)      | 692.13(17)         | 0.0318 |
| 216.7 | 7.4724(8)        | $b = a$          | 14.3147(27)      | 692.20(17)         | 0.0315 |
| 219.8 | 7.4729(8)        | $b = a$          | 14.3148(26)      | 692.29(16)         | 0.0313 |
| 223.0 | 7.4737(8)        | $b = a$          | 14.3147(25)      | 692.44(16)         | 0.0310 |
| 226.1 | 7.4742(7)        | $b = a$          | 14.3152(25)      | 692.55(15)         | 0.0307 |
| 229.2 | 7.4749(7)        | $b = a$          | 14.3159(24)      | 692.71(15)         | 0.0303 |
| 232.4 | 7.4753(7)        | $b = a$          | 14.3159(24)      | 692.80(15)         | 0.0300 |
| 235.5 | 7.4759(7)        | $b = a$          | 14.3165(23)      | 692.94(14)         | 0.0296 |
| 238.6 | 7.4764(7)        | $b = a$          | 14.3167(23)      | 693.05(14)         | 0.0293 |
| 241.8 | 7.4769(6)        | $b = a$          | 14.3160(22)      | 693.11(13)         | 0.0288 |
| 244.9 | 7.4776(6)        | $b = a$          | 14.3160(21)      | 693.22(13)         | 0.0284 |
| 248.0 | 7.4780(6)        | $b = a$          | 14.3161(21)      | 693.32(13)         | 0.0278 |
| 251.2 | 7.4786(6)        | $b = a$          | 14.3162(20)      | 693.43(12)         | 0.0274 |
| 254.3 | 7.4792(5)        | $b = a$          | 14.3153(19)      | 693.48(12)         | 0.0269 |
| 257.4 | 7.4798(5)        | $b = a$          | 14.3140(18)      | 693.54(11)         | 0.0263 |

|       |            |             |             |             |        |
|-------|------------|-------------|-------------|-------------|--------|
| 260.6 | 7.4804(5)  | $b = a$     | 14.3136(17) | 693.63(10)  | 0.0256 |
| 263.7 | 7.4812(4)  | $b = a$     | 14.3133(16) | 693.76(10)  | 0.0252 |
| 266.9 | 7.4818(4)  | $b = a$     | 14.3126(15) | 693.84(9)   | 0.0248 |
| 270.0 | 7.4825(4)  | $b = a$     | 14.3112(14) | 693.90(8)   | 0.0243 |
| 273.1 | 7.4832(35) | $b = a$     | 14.3102(13) | 693.98(8)   | 0.0233 |
| 276.3 | 7.4841(32) | $b = a$     | 14.3091(12) | 694.10(7)   | 0.0231 |
| 279.4 | 7.4845(29) | $b = a$     | 14.3074(11) | 694.10(7)   | 0.0215 |
| 282.6 | 7.4854(26) | $b = a$     | 14.3056(10) | 694.17(6)   | 0.0200 |
| 285.8 | 7.4861(23) | $b = a$     | 14.3046(9)  | 694.25(5)   | 0.0188 |
| 288.9 | 7.4869(21) | $b = a$     | 14.3034(7)  | 694.35(4)   | 0.0173 |
| 292.1 | 7.4880(18) | $b = a$     | 14.3026(6)  | 694.50(4)   | 0.0157 |
| 295.2 | 7.4888(16) | $b = a$     | 14.3019(5)  | 694.62(3)   | 0.0145 |
| 298.3 | 7.4896(14) | $b = a$     | 14.3018(5)  | 694.768(30) | 0.0138 |
| 301.4 | 7.4905(13) | $b = a$     | 14.3015(4)  | 694.927(27) | 0.0132 |
| 304.6 | 7.4911(13) | $b = a$     | 14.3011(4)  | 695.007(26) | 0.0131 |
| 307.7 | 7.4916(12) | $b = a$     | 14.3008(4)  | 695.093(25) | 0.0128 |
| 310.8 | 7.4917(12) | $b = a$     | 14.3007(4)  | 695.094(24) | 0.0123 |
| 314.0 | 7.4620(15) | $b = a$     | 13.9520(8)  | 672.8(4)    | 0.0729 |
| 317.1 | 7.4708(7)  | 12.8749(11) | 13.8707(6)  | 1334.15(18) | 0.0166 |
| 320.3 | 7.4701(6)  | 12.8728(10) | 13.8695(5)  | 1333.71(15) | 0.0150 |
| 323.4 | 7.4701(5)  | 12.8711(9)  | 13.8699(5)  | 1333.57(14) | 0.0141 |
| 326.6 | 7.4690(6)  | 12.8732(11) | 13.8692(6)  | 1333.53(17) | 0.0162 |
| 329.7 | 7.4690(6)  | 12.8732(11) | 13.8692(6)  | 1333.53(17) | 0.0162 |
| 332.9 | 7.4689(6)  | 12.8714(10) | 13.8715(5)  | 1333.54(15) | 0.0145 |
| 336.0 | 7.4683(6)  | 12.8708(10) | 13.8728(6)  | 1333.49(16) | 0.0154 |
| 339.2 | 7.4675(6)  | 12.8704(11) | 13.8740(6)  | 1333.42(17) | 0.0161 |
| 342.3 | 7.4661(6)  | 12.8703(11) | 13.8747(5)  | 1333.24(16) | 0.0156 |
| 345.4 | 7.4648(7)  | 12.8692(11) | 13.8764(6)  | 1333.06(17) | 0.0164 |
| 348.6 | 7.4639(7)  | 12.8667(11) | 13.8789(6)  | 1332.87(18) | 0.0165 |
| 351.7 | 7.4617(7)  | 12.8651(12) | 13.8811(6)  | 1332.51(19) | 0.0173 |
| 354.8 | 7.4597(7)  | 12.8614(12) | 13.8842(6)  | 1332.08(19) | 0.0176 |
| 358.0 | 7.4566(7)  | 12.8575(13) | 13.8876(6)  | 1331.45(20) | 0.0185 |
| 361.2 | 7.4534(8)  | 12.8520(13) | 13.8911(7)  | 1330.65(20) | 0.0191 |
| 364.3 | 7.4497(8)  | 12.8461(14) | 13.8947(7)  | 1329.72(22) | 0.0207 |
| 367.4 | 7.4451(9)  | 12.8391(15) | 13.8995(8)  | 1328.63(23) | 0.0220 |
| 370.6 | 7.4394(10) | 12.8321(17) | 13.9033(8)  | 1327.25(27) | 0.0251 |
| 373.7 | 7.4335(11) | 12.8264(18) | 13.9057(9)  | 1325.84(28) | 0.0260 |
| 376.9 | 7.3968(21) | 12.834(4)   | 13.8926(18) | 1318.9(6)   | 0.0403 |
| 380.0 | 7.374(4)   | 12.837(7)   | 13.878(3)   | 1313.6(11)  | 0.0480 |
| 383.2 | 7.368(5)   | 12.846(8)   | 13.867(4)   | 1312.5(12)  | 0.0468 |
| 386.3 | 7.348(12)  | 12.901(20)  | 13.846(10)  | 1312.5(32)  | 0.0732 |
| 389.5 | 7.369(11)  | 12.881(21)  | 13.841(9)   | 1313.7(30)  | 0.0700 |
| 392.6 | 7.376(10)  | 12.896(15)  | 13.823(8)   | 1314.8(24)  | 0.0618 |
| 395.7 | 7.415(12)  | 12.898(22)  | 13.786(11)  | 1318.4(32)  | 0.0944 |
| 398.9 | 7.441(10)  | 12.913(18)  | 13.737(7)   | 1319.9(26)  | 0.0753 |
| 402.0 | 7.4782(6)  | $b = a$     | 13.5998(11) | 659.70(11)  | 0.0276 |
| 405.2 | 7.4835(6)  | $b = a$     | 13.5781(11) | 658.54(9)   | 0.0273 |
| 408.3 | 7.4889(6)  | $b = a$     | 13.5578(10) | 658.50(9)   | 0.0255 |
| 411.4 | 7.4939(6)  | $b = a$     | 13.5405(11) | 658.54(9)   | 0.0261 |
| 414.6 | 7.4990(6)  | $b = a$     | 13.5226(10) | 658.56(9)   | 0.0236 |
| 417.7 | 7.5034(6)  | $b = a$     | 13.5089(10) | 658.66(9)   | 0.0233 |
| 420.9 | 7.5078(6)  | $b = a$     | 13.4963(10) | 658.82(9)   | 0.0230 |
| 424.0 | 7.5121(6)  | $b = a$     | 13.4833(10) | 658.94(9)   | 0.0227 |
| 427.1 | 7.5165(6)  | $b = a$     | 13.4731(10) | 659.22(9)   | 0.0230 |
| 430.3 | 7.5206(6)  | $b = a$     | 13.4615(10) | 659.37(9)   | 0.0221 |

|       |           |         |             |            |        |
|-------|-----------|---------|-------------|------------|--------|
| 433.4 | 7.5249(6) | $b = a$ | 13.4526(10) | 659.69(9)  | 0.0227 |
| 436.5 | 7.5299(6) | $b = a$ | 13.4414(10) | 660.02(9)  | 0.0217 |
| 439.7 | 7.5351(6) | $b = a$ | 13.4312(10) | 660.42(9)  | 0.0216 |
| 442.8 | 7.5403(7) | $b = a$ | 13.4217(13) | 660.87(11) | 0.0271 |
| 445.9 | 7.5460(6) | $b = a$ | 13.4104(10) | 661.31(9)  | 0.0214 |
| 449.1 | 7.5513(5) | $b = a$ | 13.4005(10) | 661.75(8)  | 0.0212 |
| 452.2 | 7.5565(5) | $b = a$ | 13.3902(10) | 662.15(8)  | 0.0212 |
| 455.3 | 7.5613(5) | $b = a$ | 13.3809(10) | 662.54(8)  | 0.0210 |
| 458.5 | 7.5656(5) | $b = a$ | 13.3725(10) | 662.88(8)  | 0.0213 |
| 461.6 | 7.5692(5) | $b = a$ | 13.3651(10) | 663.13(8)  | 0.0212 |
| 464.7 | 7.5718(5) | $b = a$ | 13.3582(10) | 663.25(8)  | 0.0208 |
| 467.9 | 7.5742(5) | $b = a$ | 13.3527(9)  | 663.40(8)  | 0.0208 |
| 471.0 | 7.5762(5) | $b = a$ | 13.3482(10) | 663.52(7)  | 0.0209 |
| 474.2 | 7.5778(5) | $b = a$ | 13.3432(9)  | 663.55(7)  | 0.0208 |
| 477.3 | 7.5788(5) | $b = a$ | 13.3387(9)  | 663.51(7)  | 0.0208 |
| 480.5 | 7.5799(5) | $b = a$ | 13.3359(10) | 663.57(7)  | 0.0212 |
| 483.6 | 7.5806(5) | $b = a$ | 13.3330(10) | 663.54(7)  | 0.0213 |
| 486.8 | 7.5815(4) | $b = a$ | 13.3300(9)  | 663.54(7)  | 0.0210 |
| 489.9 | 7.5820(4) | $b = a$ | 13.3277(9)  | 663.51(7)  | 0.0212 |
| 493.0 | 7.5824(5) | $b = a$ | 13.3255(11) | 663.48(8)  | 0.0228 |
| 496.2 | 7.5827(6) | $b = a$ | 13.3236(13) | 663.44(9)  | 0.0254 |
| 499.3 | 7.5833(4) | $b = a$ | 13.3208(10) | 663.40(7)  | 0.0216 |

**Table S2** Lattice parameters and weighted profile R-factors from Rietveld refinement using XRPD data for dehydration of  $\text{LuCo}(\text{CN})_6 \cdot 4\text{H}_2\text{O}$  (12-BM, APS). No shading denotes refinements in  $Cmcm$ . Light shading denotes unsatisfactory refinements during the phase transition. Dark shading denotes refinements in  $P6_3/mmc$ .

| T / K | $a / \text{\AA}$ | $b / \text{\AA}$ | $c / \text{\AA}$ | $V / \text{\AA}^3$ | wRp    |
|-------|------------------|------------------|------------------|--------------------|--------|
| 100.3 | 7.21762(24)      | 12.4973(4)       | 13.36567(18)     | 1205.60(6)         | 0.0223 |
| 103.6 | 7.21767(24)      | 12.4981(5)       | 13.36596(18)     | 1205.70(6)         | 0.0225 |
| 106.9 | 7.21768(24)      | 12.4988(4)       | 13.36611(18)     | 1205.78(6)         | 0.0223 |
| 110.2 | 7.21772(24)      | 12.4997(5)       | 13.36648(18)     | 1205.92(6)         | 0.0225 |
| 113.5 | 7.21771(24)      | 12.5005(5)       | 13.36667(18)     | 1206.01(6)         | 0.0226 |
| 116.8 | 7.21774(24)      | 12.5012(5)       | 13.36681(18)     | 1206.10(6)         | 0.0226 |
| 120.1 | 7.21768(24)      | 12.5018(5)       | 13.36681(18)     | 1206.14(6)         | 0.0226 |
| 123.4 | 7.21782(24)      | 12.5030(5)       | 13.36738(18)     | 1206.33(6)         | 0.0227 |
| 126.7 | 7.21770(24)      | 12.5038(5)       | 13.36745(18)     | 1206.39(6)         | 0.0226 |
| 130.0 | 7.21781(24)      | 12.5048(5)       | 13.36791(18)     | 1206.55(6)         | 0.0227 |
| 133.3 | 7.21783(24)      | 12.5056(5)       | 13.36818(18)     | 1206.66(6)         | 0.0228 |
| 136.6 | 7.21773(24)      | 12.5063(5)       | 13.36817(18)     | 1206.70(6)         | 0.0227 |
| 139.9 | 7.21770(24)      | 12.5071(5)       | 13.36837(18)     | 1206.80(6)         | 0.0227 |
| 143.2 | 7.21771(24)      | 12.5079(5)       | 13.36855(18)     | 1206.89(6)         | 0.0226 |
| 146.5 | 7.21768(24)      | 12.5088(5)       | 13.36876(18)     | 1206.99(6)         | 0.0226 |
| 149.8 | 7.21774(24)      | 12.5099(5)       | 13.36922(18)     | 1207.15(6)         | 0.0227 |
| 153.1 | 7.21770(24)      | 12.5108(5)       | 13.36947(18)     | 1207.25(6)         | 0.0226 |
| 156.4 | 7.21772(24)      | 12.5117(5)       | 13.36971(18)     | 1207.37(6)         | 0.0226 |
| 159.7 | 7.21773(24)      | 12.5126(5)       | 13.36994(18)     | 1207.47(6)         | 0.0226 |
| 163.0 | 7.21768(24)      | 12.5136(5)       | 13.37021(18)     | 1207.58(6)         | 0.0225 |
| 166.3 | 7.21769(24)      | 12.5145(5)       | 13.37049(18)     | 1207.70(6)         | 0.0225 |
| 169.7 | 7.21777(24)      | 12.5156(5)       | 13.37098(18)     | 1207.86(6)         | 0.0226 |
| 173.0 | 7.21765(24)      | 12.5164(4)       | 13.37108(18)     | 1207.93(6)         | 0.0225 |
| 176.3 | 7.21763(23)      | 12.5174(4)       | 13.37137(18)     | 1208.05(6)         | 0.0222 |
| 179.6 | 7.21764(23)      | 12.5184(4)       | 13.37162(18)     | 1208.17(6)         | 0.0223 |
| 182.9 | 7.21766(23)      | 12.5196(4)       | 13.37213(18)     | 1208.33(6)         | 0.0223 |
| 186.3 | 7.21762(23)      | 12.5205(4)       | 13.37244(18)     | 1208.44(6)         | 0.0222 |
| 189.6 | 7.21754(23)      | 12.5214(4)       | 13.37256(18)     | 1208.53(6)         | 0.0221 |
| 192.9 | 7.21754(23)      | 12.5223(4)       | 13.37288(18)     | 1208.64(6)         | 0.0220 |
| 196.2 | 7.21750(23)      | 12.5233(4)       | 13.37309(17)     | 1208.76(6)         | 0.0218 |
| 199.5 | 7.21751(23)      | 12.5245(4)       | 13.37355(18)     | 1208.92(6)         | 0.0219 |
| 202.9 | 7.21749(22)      | 12.5256(4)       | 13.37391(18)     | 1209.05(6)         | 0.0218 |
| 206.2 | 7.21745(22)      | 12.5267(4)       | 13.37429(17)     | 1209.18(6)         | 0.0217 |
| 209.5 | 7.21739(22)      | 12.5278(4)       | 13.37456(17)     | 1209.30(6)         | 0.0216 |
| 212.8 | 7.21733(22)      | 12.5286(4)       | 13.37471(17)     | 1209.39(6)         | 0.0215 |
| 216.1 | 7.21726(21)      | 12.5298(4)       | 13.37506(17)     | 1209.52(6)         | 0.0213 |
| 219.4 | 7.21725(21)      | 12.5309(4)       | 13.37538(17)     | 1209.65(6)         | 0.0213 |
| 222.7 | 7.21728(21)      | 12.5321(4)       | 13.37584(17)     | 1209.82(5)         | 0.0213 |
| 226.0 | 7.21723(21)      | 12.5332(4)       | 13.37620(17)     | 1209.95(5)         | 0.0210 |
| 229.4 | 7.21722(21)      | 12.5344(4)       | 13.37663(17)     | 1210.10(5)         | 0.0211 |
| 232.7 | 7.21715(21)      | 12.5356(4)       | 13.37690(17)     | 1210.23(5)         | 0.0210 |
| 236.0 | 7.21703(20)      | 12.5365(4)       | 13.37707(17)     | 1210.31(5)         | 0.0208 |
| 239.3 | 7.21696(20)      | 12.5377(4)       | 13.37743(17)     | 1210.45(5)         | 0.0207 |
| 242.6 | 7.21700(20)      | 12.5391(4)       | 13.37796(17)     | 1210.63(5)         | 0.0207 |
| 245.9 | 7.21695(20)      | 12.5403(4)       | 13.37835(17)     | 1210.78(5)         | 0.0206 |
| 249.2 | 7.21689(19)      | 12.5417(4)       | 13.37878(17)     | 1210.94(5)         | 0.0205 |
| 252.5 | 7.21686(19)      | 12.5429(4)       | 13.37915(17)     | 1211.08(5)         | 0.0204 |
| 255.9 | 7.21685(19)      | 12.5441(4)       | 13.37958(17)     | 1211.24(5)         | 0.0203 |
| 259.2 | 7.21683(19)      | 12.5456(3)       | 13.37998(17)     | 1211.41(5)         | 0.0201 |
| 262.5 | 7.21667(18)      | 12.5467(3)       | 13.38018(17)     | 1211.52(5)         | 0.0200 |
| 265.7 | 7.21675(18)      | 12.5484(3)       | 13.38087(17)     | 1211.75(5)         | 0.0200 |

|       |             |             |              |             |        |
|-------|-------------|-------------|--------------|-------------|--------|
| 269.1 | 7.21670(18) | 12.5498(3)  | 13.38133(17) | 1211.93(5)  | 0.0199 |
| 272.4 | 7.21667(17) | 12.5513(3)  | 13.38175(17) | 1212.10(5)  | 0.0197 |
| 275.7 | 7.21664(17) | 12.5529(3)  | 13.38224(17) | 1212.29(4)  | 0.0198 |
| 279.0 | 7.21658(17) | 12.5545(3)  | 13.38273(17) | 1212.48(4)  | 0.0199 |
| 282.4 | 7.21661(17) | 12.5563(3)  | 13.38330(17) | 1212.71(4)  | 0.0198 |
| 285.6 | 7.21645(16) | 12.5576(3)  | 13.38357(17) | 1212.84(4)  | 0.0196 |
| 289.0 | 7.21634(16) | 12.5592(3)  | 13.38405(17) | 1213.02(4)  | 0.0196 |
| 292.3 | 7.21617(15) | 12.5606(3)  | 13.38426(16) | 1213.14(4)  | 0.0194 |
| 295.6 | 7.21613(15) | 12.5622(3)  | 13.38488(16) | 1213.35(4)  | 0.0194 |
| 298.9 | 7.21587(15) | 12.5637(3)  | 13.38523(16) | 1213.48(4)  | 0.0193 |
| 302.2 | 7.21587(14) | 12.5655(3)  | 13.38591(16) | 1213.71(4)  | 0.0193 |
| 305.5 | 7.21574(14) | 12.5669(3)  | 13.38631(16) | 1213.86(4)  | 0.0192 |
| 308.8 | 7.21550(14) | 12.5683(3)  | 13.38661(16) | 1213.99(4)  | 0.0191 |
| 312.1 | 7.21529(13) | 12.5714(2)  | 13.38770(16) | 1214.35(4)  | 0.0190 |
| 315.5 | 7.21513(13) | 12.5729(2)  | 13.38816(16) | 1214.51(4)  | 0.0190 |
| 318.8 | 7.21460(13) | 12.5732(2)  | 13.38814(16) | 1214.44(4)  | 0.0188 |
| 322.1 | 7.21262(14) | 12.5705(3)  | 13.38737(17) | 1213.78(4)  | 0.0184 |
| 325.4 | 7.21189(13) | 12.5714(2)  | 13.38762(17) | 1213.77(4)  | 0.0181 |
| 328.7 | 7.21133(14) | 12.5727(2)  | 13.38798(17) | 1213.83(4)  | 0.0183 |
| 332.0 | 7.21072(13) | 12.5738(2)  | 13.38824(17) | 1213.86(4)  | 0.0181 |
| 335.3 | 7.21021(13) | 12.5752(2)  | 13.38863(17) | 1213.94(4)  | 0.0180 |
| 338.6 | 7.20963(13) | 12.5767(2)  | 13.38898(17) | 1214.02(4)  | 0.0179 |
| 341.9 | 7.20899(13) | 12.5781(2)  | 13.38927(17) | 1214.08(4)  | 0.0180 |
| 345.2 | 7.20823(13) | 12.5796(2)  | 13.38943(17) | 1214.11(4)  | 0.0180 |
| 348.5 | 7.20750(13) | 12.5812(2)  | 13.38931(18) | 1214.13(4)  | 0.0180 |
| 351.8 | 7.20666(13) | 12.5829(2)  | 13.38858(18) | 1214.08(4)  | 0.0180 |
| 355.1 | 7.20581(14) | 12.5850(2)  | 13.38691(19) | 1213.99(4)  | 0.0189 |
| 358.4 | 7.20520(16) | 12.5873(3)  | 13.38410(24) | 1213.86(4)  | 0.0224 |
| 361.7 | 7.20428(23) | 12.5898(4)  | 13.3821(3)   | 1213.77(6)  | 0.0297 |
| 365.0 | 7.2042(4)   | 12.5931(6)  | 13.3782(6)   | 1213.73(10) | 0.0481 |
| 368.3 | 7.2052(7)   | 12.5989(11) | 13.3718(12)  | 1213.86(19) | 0.0766 |
| 371.6 | 7.207(27)   | 12.617(5)   | 13.339(4)    | 1212.9(8)   | 0.1602 |
| 374.9 |             |             |              |             |        |
| 378.2 |             |             |              |             |        |
| 381.6 |             |             |              |             |        |
| 384.9 |             |             |              |             |        |
| 388.2 |             |             |              |             |        |
| 391.5 |             |             |              |             |        |
| 394.8 |             |             |              |             |        |
| 398.1 |             |             |              |             |        |
| 401.4 |             |             |              |             |        |
| 404.7 |             |             |              |             |        |
| 408.0 | 7.282(7)    | $b = a$     | 13.009(10)   | 597.4(9)    | 0.1734 |
| 411.3 | 7.285(24)   | $b = a$     | 13.024(34)   | 599(3)      | 0.3257 |
| 414.6 | 7.2655(10)  | $b = a$     | 12.9708(21)  | 592.96(15)  | 0.0897 |
| 417.9 | 7.2685(3)   | $b = a$     | 12.9557(7)   | 592.75(5)   | 0.0414 |
| 421.2 | 7.27070(23) | $b = a$     | 12.9468(5)   | 592.72(4)   | 0.0333 |
| 424.5 | 7.27225(19) | $b = a$     | 12.9394(4)   | 592.627(30) | 0.0297 |
| 427.8 | 7.27346(18) | $b = a$     | 12.9331(4)   | 592.537(28) | 0.0279 |
| 431.1 | 7.27431(17) | $b = a$     | 12.9279(4)   | 592.437(26) | 0.0269 |
| 434.4 | 7.27508(16) | $b = a$     | 12.9233(4)   | 592.353(25) | 0.0262 |
| 437.7 | 7.27543(16) | $b = a$     | 12.9189(4)   | 592.207(25) | 0.0258 |
| 441.0 | 7.27586(15) | $b = a$     | 12.9155(4)   | 592.119(24) | 0.0254 |
| 444.3 | 7.27609(15) | $b = a$     | 12.9122(4)   | 592.006(24) | 0.0252 |
| 447.6 | 7.27633(15) | $b = a$     | 12.9095(4)   | 591.922(24) | 0.0251 |

|       |             |         |            |             |        |
|-------|-------------|---------|------------|-------------|--------|
| 451.0 | 7.27613(15) | $b = a$ | 12.9064(4) | 591.747(24) | 0.0250 |
| 454.3 | 7.27621(15) | $b = a$ | 12.9042(4) | 591.662(24) | 0.0250 |
| 457.6 | 7.27611(15) | $b = a$ | 12.9021(4) | 591.550(24) | 0.0249 |
| 460.9 | 7.27584(14) | $b = a$ | 12.8999(4) | 591.402(23) | 0.0247 |
| 464.2 | 7.27563(14) | $b = a$ | 12.8980(4) | 591.282(23) | 0.0245 |
| 467.5 | 7.27551(14) | $b = a$ | 12.8967(4) | 591.204(23) | 0.0245 |
| 470.8 | 7.27525(14) | $b = a$ | 12.8954(4) | 591.101(23) | 0.0243 |
| 474.1 | 7.27496(14) | $b = a$ | 12.8941(4) | 590.992(23) | 0.0241 |
| 477.4 | 7.27462(14) | $b = a$ | 12.8928(4) | 590.877(23) | 0.0240 |
| 480.7 | 7.27425(14) | $b = a$ | 12.8916(4) | 590.762(23) | 0.0239 |
| 484.0 | 7.27388(14) | $b = a$ | 12.8906(3) | 590.659(23) | 0.0237 |
| 487.3 | 7.27352(14) | $b = a$ | 12.8898(3) | 590.564(22) | 0.0235 |
| 490.6 | 7.27315(14) | $b = a$ | 12.8889(3) | 590.459(22) | 0.0233 |
| 493.9 | 7.27261(14) | $b = a$ | 12.8878(3) | 590.325(22) | 0.0232 |
| 497.2 | 7.27234(14) | $b = a$ | 12.8873(3) | 590.257(22) | 0.0230 |
| 500.6 | 7.27202(14) | $b = a$ | 12.8868(3) | 590.182(22) | 0.0229 |
| 500.0 | 7.27168(14) | $b = a$ | 12.8862(3) | 590.099(22) | 0.0227 |
| 500.0 | 7.27150(13) | $b = a$ | 12.8859(3) | 590.054(22) | 0.0226 |

**Table S3** Lattice parameters and weighted profile R-factors from Rietveld refinement using XRPD data for dehydration of  $\text{KLaFe}(\text{CN})_6 \cdot 4\text{H}_2\text{O}$  (1-BM, APS). Light shading denotes unsatisfactory refinements during a phase transition.

| <b><i>P6<sub>3</sub>/m</i> hydrated phase</b> |              |              |                    |        |
|-----------------------------------------------|--------------|--------------|--------------------|--------|
| T / K                                         | <i>a</i> / Å | <i>c</i> / Å | V / Å <sup>3</sup> | wRp    |
| 100.0                                         | 7.37949(4)   | 13.86231(14) | 653.761(8)         | 0.0585 |
| 100.4                                         | 7.37939(4)   | 13.86234(14) | 653.744(8)         | 0.0587 |
| 104.6                                         | 7.37989(4)   | 13.86380(13) | 653.902(8)         | 0.0583 |
| 108.6                                         | 7.38028(4)   | 13.86510(13) | 654.033(8)         | 0.0584 |
| 112.7                                         | 7.38061(4)   | 13.86630(13) | 654.148(8)         | 0.0583 |
| 116.7                                         | 7.38119(4)   | 13.86791(13) | 654.326(8)         | 0.0580 |
| 120.7                                         | 7.38166(4)   | 13.86934(13) | 654.476(8)         | 0.0579 |
| 124.7                                         | 7.38226(4)   | 13.87100(13) | 654.663(8)         | 0.0578 |
| 128.7                                         | 7.38272(4)   | 13.87230(13) | 654.805(8)         | 0.0580 |
| 132.7                                         | 7.38316(4)   | 13.87363(13) | 654.945(8)         | 0.0578 |
| 136.8                                         | 7.38366(4)   | 13.87502(13) | 655.100(8)         | 0.0573 |
| 140.7                                         | 7.38413(4)   | 13.87633(13) | 655.246(8)         | 0.0572 |
| 144.8                                         | 7.38464(4)   | 13.87770(13) | 655.400(8)         | 0.0572 |
| 148.8                                         | 7.38529(4)   | 13.87931(13) | 655.593(8)         | 0.0572 |
| 152.8                                         | 7.38580(4)   | 13.88063(13) | 655.744(8)         | 0.0571 |
| 156.8                                         | 7.38617(4)   | 13.88171(13) | 655.862(8)         | 0.0569 |
| 160.8                                         | 7.38686(4)   | 13.88336(13) | 656.062(8)         | 0.0571 |
| 164.8                                         | 7.38733(4)   | 13.88455(13) | 656.201(8)         | 0.0569 |
| 168.8                                         | 7.38797(4)   | 13.88609(13) | 656.389(8)         | 0.0573 |
| 172.8                                         | 7.38847(4)   | 13.88735(13) | 656.536(8)         | 0.0570 |
| 176.8                                         | 7.38896(4)   | 13.88860(13) | 656.684(8)         | 0.0572 |
| 180.8                                         | 7.38947(4)   | 13.88983(13) | 656.833(8)         | 0.0577 |
| 184.8                                         | 7.38989(4)   | 13.89101(13) | 656.961(8)         | 0.0564 |
| 188.8                                         | 7.39054(4)   | 13.89255(13) | 657.151(8)         | 0.0568 |
| 192.8                                         | 7.39088(4)   | 13.89348(13) | 657.254(8)         | 0.0563 |
| 196.8                                         | 7.39160(4)   | 13.89512(13) | 657.460(8)         | 0.0566 |
| 200.8                                         | 7.39201(4)   | 13.89615(13) | 657.582(8)         | 0.0562 |
| 204.8                                         | 7.39265(4)   | 13.89756(13) | 657.764(8)         | 0.0565 |
| 208.9                                         | 7.39315(4)   | 13.89866(13) | 657.904(8)         | 0.0564 |
| 212.9                                         | 7.39365(4)   | 13.89979(13) | 658.047(8)         | 0.0564 |
| 216.9                                         | 7.39408(4)   | 13.90071(13) | 658.167(8)         | 0.0561 |
| 220.9                                         | 7.39452(4)   | 13.90162(13) | 658.288(8)         | 0.0561 |
| 224.9                                         | 7.39493(4)   | 13.90241(13) | 658.399(8)         | 0.0558 |
| 228.9                                         | 7.39538(4)   | 13.90324(13) | 658.518(8)         | 0.0557 |
| 232.9                                         | 7.39589(4)   | 13.90420(13) | 658.654(8)         | 0.0563 |
| 236.9                                         | 7.39611(4)   | 13.90471(13) | 658.718(8)         | 0.0552 |
| 240.9                                         | 7.39672(4)   | 13.90599(13) | 658.887(8)         | 0.0559 |
| 244.9                                         | 7.39716(4)   | 13.90701(13) | 659.013(8)         | 0.0554 |
| 248.9                                         | 7.39762(4)   | 13.90813(13) | 659.150(8)         | 0.0554 |
| 252.9                                         | 7.39809(4)   | 13.90926(13) | 659.286(8)         | 0.0548 |
| 256.9                                         | 7.39859(4)   | 13.91043(13) | 659.431(8)         | 0.0547 |
| 260.9                                         | 7.39911(4)   | 13.91165(13) | 659.581(8)         | 0.0546 |
| 264.9                                         | 7.39968(4)   | 13.91296(13) | 659.746(8)         | 0.0545 |
| 269.0                                         | 7.40017(4)   | 13.91410(13) | 659.886(8)         | 0.0536 |
| 272.9                                         | 7.40090(4)   | 13.91573(13) | 660.094(8)         | 0.0548 |
| 276.9                                         | 7.40148(4)   | 13.91705(13) | 660.260(8)         | 0.0551 |
| 281.0                                         | 7.40202(4)   | 13.91835(13) | 660.418(8)         | 0.0548 |
| 285.0                                         | 7.40259(4)   | 13.91966(13) | 660.581(8)         | 0.0552 |
| 289.0                                         | 7.40316(4)   | 13.92099(13) | 660.748(8)         | 0.0553 |
| 293.0                                         | 7.40371(4)   | 13.92227(13) | 660.906(8)         | 0.0559 |



|       |             |              |             |        |
|-------|-------------|--------------|-------------|--------|
| 297.0 | 7.40417(4)  | 13.92338(13) | 661.040(8)  | 0.0562 |
| 301.0 | 7.40464(4)  | 13.92443(13) | 661.174(8)  | 0.0560 |
| 305.0 | 7.40511(4)  | 13.92546(13) | 661.308(8)  | 0.0561 |
| 309.0 | 7.40557(4)  | 13.92645(14) | 661.437(9)  | 0.0565 |
| 313.5 | 7.40613(4)  | 13.92762(14) | 661.591(9)  | 0.0567 |
| 317.1 | 7.40659(5)  | 13.92845(14) | 661.713(9)  | 0.0577 |
| 321.1 | 7.40687(5)  | 13.92887(14) | 661.784(9)  | 0.0580 |
| 325.1 | 7.40721(5)  | 13.92929(14) | 661.863(9)  | 0.0578 |
| 329.1 | 7.40750(5)  | 13.92953(14) | 661.928(9)  | 0.0583 |
| 333.2 | 7.40781(5)  | 13.92966(14) | 661.990(9)  | 0.0585 |
| 337.1 | 7.40793(5)  | 13.92925(14) | 661.991(9)  | 0.0578 |
| 341.2 | 7.40828(5)  | 13.92909(14) | 662.045(9)  | 0.0585 |
| 345.2 | 7.40838(5)  | 13.92823(15) | 662.024(9)  | 0.0586 |
| 349.2 | 7.40840(5)  | 13.92691(15) | 661.964(9)  | 0.0588 |
| 353.1 | 7.40828(5)  | 13.92495(15) | 661.849(9)  | 0.0589 |
| 357.2 | 7.40802(5)  | 13.92229(15) | 661.676(9)  | 0.0591 |
| 361.2 | 7.40750(5)  | 13.91850(15) | 661.403(9)  | 0.0590 |
| 365.2 | 7.40659(5)  | 13.91339(15) | 660.997(10) | 0.0596 |
| 369.2 | 7.40530(5)  | 13.90720(16) | 660.474(10) | 0.0606 |
| 373.2 | 7.40361(5)  | 13.90017(16) | 659.839(10) | 0.0624 |
| 377.2 | 7.40168(6)  | 13.89305(17) | 659.156(11) | 0.0645 |
| 381.2 | 7.39961(6)  | 13.88617(18) | 658.463(11) | 0.0667 |
| 385.2 | 7.39814(6)  | 13.88110(20) | 657.960(12) | 0.0708 |
| 389.2 | 7.39867(17) | 13.8770(6)   | 657.86(4)   | 0.1568 |

393.2  
401.2  
409.2  
417.2  
425.2  
433.2  
441.2

|       |            |              |             |        |
|-------|------------|--------------|-------------|--------|
| 449.2 | 7.32838(8) | 13.81403(26) | 642.491(16) | 0.0637 |
| 453.2 | 7.32572(6) | 13.81096(20) | 641.882(12) | 0.0561 |
| 457.2 | 7.32141(6) | 13.80714(20) | 640.950(12) | 0.0563 |
| 461.2 | 7.31720(6) | 13.80259(20) | 640.001(12) | 0.0563 |
| 465.2 | 7.31375(6) | 13.79792(20) | 639.181(12) | 0.0562 |
| 469.2 | 7.31042(6) | 13.79275(20) | 638.361(12) | 0.0562 |
| 473.2 | 7.30774(6) | 13.78727(20) | 637.639(12) | 0.0561 |
| 477.2 | 7.30527(6) | 13.78163(20) | 636.949(12) | 0.0559 |
| 481.2 | 7.30329(6) | 13.77581(20) | 636.334(12) | 0.0560 |
| 485.3 | 7.30174(6) | 13.77014(20) | 635.802(12) | 0.0555 |
| 489.2 | 7.30045(6) | 13.76478(20) | 635.330(12) | 0.0555 |
| 493.2 | 7.29946(6) | 13.75971(20) | 634.922(12) | 0.0551 |
| 497.1 | 7.29917(6) | 13.75413(20) | 634.616(12) | 0.0546 |
| 500.3 | 7.29914(6) | 13.74874(20) | 634.361(12) | 0.0546 |
| 500.2 | 7.29848(6) | 13.74522(19) | 634.085(12) | 0.0536 |
| 500.0 | 7.29859(6) | 13.74352(19) | 634.026(12) | 0.0527 |
| 500.0 | 7.29876(6) | 13.74320(19) | 634.041(12) | 0.0519 |
| 500.0 | 7.29920(6) | 13.74327(18) | 634.120(11) | 0.0486 |
| 500.0 | 7.29958(6) | 13.74367(18) | 634.204(11) | 0.0468 |
| 500.0 | 7.30019(6) | 13.74479(18) | 634.362(11) | 0.0457 |
| 500.0 | 7.30031(6) | 13.74513(18) | 634.399(11) | 0.0446 |
| 500.0 | 7.30082(6) | 13.74596(18) | 634.525(11) | 0.0435 |
| 500.0 | 7.30082(6) | 13.74635(18) | 634.543(11) | 0.0421 |
| 500.0 | 7.30102(6) | 13.74712(19) | 634.613(11) | 0.0420 |

***P3̄1c* dehydrated phase**

| <i>a</i> / Å | <i>c</i> / Å | <i>V</i> / Å <sup>3</sup> | wRp    |
|--------------|--------------|---------------------------|--------|
| 7.2789(20)   | 12.103(7)    | 555.3(4)                  | 0.0486 |
| 7.2722(16)   | 12.107(6)    | 554.47(31)                | 0.0468 |
| 7.2711(13)   | 12.113(5)    | 554.61(27)                | 0.0457 |
| 7.2615(12)   | 12.136(5)    | 554.17(25)                | 0.0446 |
| 7.2578(10)   | 12.146(4)    | 554.09(21)                | 0.0435 |
| 7.2524(9)    | 12.1613(32)  | 553.95(18)                | 0.0421 |
| 7.2474(9)    | 12.1748(28)  | 553.80(16)                | 0.0420 |



**Table S4** Lattice parameters and weighted profile R-factors from Rietveld refinement using XRPD data for dehydration of  $\text{KLuFe}(\text{CN})_6 \cdot 3.5\text{H}_2\text{O}$  (1-BM, APS).

| <b><i>Cmcm</i> hydrated phase</b> |             |              |              |                    |        |
|-----------------------------------|-------------|--------------|--------------|--------------------|--------|
| T / K                             | a / Å       | b / Å        | c / Å        | V / Å <sup>3</sup> | wRp    |
| 100.0                             | 7.13181(16) | 12.47974(25) | 13.3958(3)   | 1192.27(4)         | 0.0590 |
| 100.1                             | 7.13184(16) | 12.47981(26) | 13.3961(3)   | 1192.30(4)         | 0.0594 |
| 104.2                             | 7.13236(16) | 12.48001(25) | 13.3959(3)   | 1192.40(4)         | 0.0590 |
| 108.3                             | 7.13325(18) | 12.48059(29) | 13.3959(3)   | 1192.60(5)         | 0.0673 |
| 112.3                             | 7.13387(16) | 12.48089(25) | 13.3958(3)   | 1192.72(4)         | 0.0588 |
| 116.3                             | 7.13481(17) | 12.48150(28) | 13.3957(3)   | 1192.93(5)         | 0.0659 |
| 120.3                             | 7.13541(16) | 12.48180(25) | 13.3957(3)   | 1193.06(4)         | 0.0586 |
| 124.3                             | 7.13623(16) | 12.48228(25) | 13.3956(3)   | 1193.23(4)         | 0.0584 |
| 128.3                             | 7.13714(15) | 12.48303(25) | 13.3960(3)   | 1193.49(4)         | 0.0585 |
| 132.3                             | 7.13773(16) | 12.48357(25) | 13.3963(3)   | 1193.67(4)         | 0.0583 |
| 136.3                             | 7.13852(18) | 12.48406(28) | 13.3964(3)   | 1193.85(5)         | 0.0666 |
| 140.3                             | 7.13923(16) | 12.48449(25) | 13.39642(29) | 1194.02(4)         | 0.0582 |
| 144.3                             | 7.14011(15) | 12.48513(25) | 13.39636(29) | 1194.22(4)         | 0.0577 |
| 148.3                             | 7.14088(17) | 12.48563(28) | 13.3965(3)   | 1194.41(5)         | 0.0644 |
| 152.4                             | 7.14153(15) | 12.48613(25) | 13.39656(29) | 1194.57(4)         | 0.0572 |
| 156.3                             | 7.14232(16) | 12.48672(25) | 13.39674(29) | 1194.78(4)         | 0.0576 |
| 160.3                             | 7.14309(16) | 12.48720(25) | 13.39684(29) | 1194.96(4)         | 0.0576 |
| 164.4                             | 7.14387(16) | 12.48758(25) | 13.39674(29) | 1195.12(4)         | 0.0572 |
| 168.4                             | 7.14466(16) | 12.48829(25) | 13.39695(29) | 1195.34(4)         | 0.0572 |
| 172.4                             | 7.14567(16) | 12.48889(25) | 13.39672(29) | 1195.54(4)         | 0.0569 |
| 176.4                             | 7.14668(15) | 12.48971(25) | 13.39704(28) | 1195.82(4)         | 0.0566 |
| 180.4                             | 7.14945(15) | 12.49169(25) | 13.39679(28) | 1196.45(4)         | 0.0596 |
| 184.4                             | 7.15033(17) | 12.49233(27) | 13.39684(32) | 1196.66(5)         | 0.0625 |
| 188.4                             | 7.15041(15) | 12.49228(24) | 13.39692(28) | 1196.68(4)         | 0.0565 |
| 192.4                             | 7.15085(18) | 12.49275(29) | 13.3975(3)   | 1196.85(5)         | 0.0658 |
| 196.5                             | 7.15137(16) | 12.49298(24) | 13.39726(28) | 1196.94(4)         | 0.0563 |
| 200.5                             | 7.15218(16) | 12.49367(25) | 13.39771(28) | 1197.18(4)         | 0.0564 |
| 204.5                             | 7.15278(16) | 12.49387(24) | 13.39738(28) | 1197.27(4)         | 0.0559 |
| 208.5                             | 7.15386(15) | 12.49466(24) | 13.39748(28) | 1197.53(4)         | 0.0558 |
| 212.5                             | 7.15455(15) | 12.49515(24) | 13.39743(27) | 1197.69(4)         | 0.0549 |
| 216.5                             | 7.15561(17) | 12.49599(27) | 13.3978(3)   | 1197.99(5)         | 0.0617 |
| 220.5                             | 7.15648(15) | 12.49667(24) | 13.39795(28) | 1198.21(4)         | 0.0549 |
| 224.6                             | 7.15745(15) | 12.49712(24) | 13.39762(28) | 1198.38(4)         | 0.0550 |
| 228.6                             | 7.15840(15) | 12.49792(24) | 13.39790(28) | 1198.64(4)         | 0.0548 |
| 232.6                             | 7.15932(15) | 12.49866(24) | 13.39788(27) | 1198.87(4)         | 0.0544 |
| 236.6                             | 7.16020(16) | 12.49908(24) | 13.39757(28) | 1199.03(4)         | 0.0550 |
| 240.6                             | 7.16109(15) | 12.49990(24) | 13.39763(27) | 1199.26(4)         | 0.0540 |
| 244.6                             | 7.16206(16) | 12.50051(24) | 13.39739(27) | 1199.46(4)         | 0.0542 |
| 248.7                             | 7.16305(16) | 12.50150(24) | 13.39744(27) | 1199.72(4)         | 0.0542 |
| 252.7                             | 7.16409(15) | 12.50233(24) | 13.39710(27) | 1199.95(4)         | 0.0539 |
| 256.7                             | 7.16499(16) | 12.50316(25) | 13.39700(28) | 1200.17(4)         | 0.0545 |
| 260.7                             | 7.16585(15) | 12.50414(24) | 13.39704(27) | 1200.41(4)         | 0.0533 |
| 264.7                             | 7.16679(15) | 12.50494(24) | 13.39680(27) | 1200.63(4)         | 0.0531 |
| 268.7                             | 7.16775(16) | 12.50575(24) | 13.39686(27) | 1200.87(4)         | 0.0538 |
| 272.7                             | 7.16874(27) | 12.50660(40) | 13.3972(5)   | 1201.15(7)         | 0.0909 |
| 276.7                             | 7.16990(15) | 12.50760(24) | 13.39706(27) | 1201.43(4)         | 0.0526 |
| 280.7                             | 7.17103(15) | 12.50840(24) | 13.39709(27) | 1201.69(4)         | 0.0525 |
| 284.7                             | 7.17229(16) | 12.50926(24) | 13.39707(27) | 1201.98(4)         | 0.0528 |
| 288.7                             | 7.17357(15) | 12.50995(24) | 13.39663(27) | 1202.23(4)         | 0.0524 |
| 292.7                             | 7.17499(16) | 12.51106(24) | 13.39639(27) | 1202.55(4)         | 0.0529 |
| 296.7                             | 7.17609(16) | 12.51160(24) | 13.39538(26) | 1202.70(4)         | 0.0524 |

|       |             |              |              |             |        |                                     |              |                    |        |
|-------|-------------|--------------|--------------|-------------|--------|-------------------------------------|--------------|--------------------|--------|
| 300.6 | 7.17727(16) | 12.51230(24) | 13.39459(26) | 1202.89(4)  | 0.0521 |                                     |              |                    |        |
| 304.6 | 7.17857(16) | 12.51302(24) | 13.39362(26) | 1203.09(4)  | 0.0518 |                                     |              |                    |        |
| 308.6 | 7.17979(16) | 12.51369(25) | 13.39252(27) | 1203.26(4)  | 0.0517 |                                     |              |                    |        |
| 312.7 | 7.18146(16) | 12.51474(25) | 13.39108(26) | 1203.51(4)  | 0.0511 |                                     |              |                    |        |
| 316.7 | 7.18250(40) | 12.5154(6)   | 13.38990(60) | 1203.64(10) | 0.1163 |                                     |              |                    |        |
| 320.7 | 7.18390(16) | 12.51626(25) | 13.38900(26) | 1203.88(4)  | 0.0504 |                                     |              |                    |        |
| 324.8 | 7.18513(21) | 12.5170(3)   | 13.3878(4)   | 1204.05(6)  | 0.0655 |                                     |              |                    |        |
| 328.9 | 7.18624(18) | 12.51753(28) | 13.3862(3)   | 1204.14(5)  | 0.0555 |                                     |              |                    |        |
| 332.9 | 7.18746(27) | 12.5181(4)   | 13.3848(5)   | 1204.27(7)  | 0.0811 |                                     |              |                    |        |
| 337.0 | 7.18887(25) | 12.5194(4)   | 13.3834(4)   | 1204.51(7)  | 0.0746 |                                     |              |                    |        |
| 340.8 | 7.18986(17) | 12.51967(27) | 13.38149(27) | 1204.53(5)  | 0.0485 |                                     |              |                    |        |
| 344.8 | 7.19107(17) | 12.52070(27) | 13.37954(26) | 1204.66(4)  | 0.0476 |                                     |              |                    |        |
| 348.8 | 7.19232(17) | 12.52174(27) | 13.37710(26) | 1204.75(5)  | 0.0471 |                                     |              |                    |        |
| 352.8 | 7.19359(18) | 12.52307(27) | 13.37415(26) | 1204.82(5)  | 0.0465 |                                     |              |                    |        |
| 356.8 | 7.19509(18) | 12.52494(28) | 13.37026(27) | 1204.90(5)  | 0.0463 |                                     |              |                    |        |
| 360.9 | 7.19673(19) | 12.52729(30) | 13.36465(27) | 1204.90(5)  | 0.0459 |                                     |              |                    |        |
| 364.9 | 7.19866(20) | 12.5307(3)   | 13.35699(29) | 1204.85(5)  | 0.0460 |                                     |              |                    |        |
| 368.9 | 7.20089(22) | 12.5356(3)   | 13.3459(3)   | 1204.70(6)  | 0.0459 |                                     |              |                    |        |
| 372.9 | 7.20323(23) | 12.5430(4)   | 13.3305(3)   | 1204.42(6)  | 0.0457 |                                     |              |                    |        |
| 376.9 | 7.20602(25) | 12.5527(4)   | 13.3104(4)   | 1203.99(7)  | 0.0460 |                                     |              |                    |        |
| 380.9 | 7.21233(33) | 12.5634(5)   | 13.2815(4)   | 1203.45(8)  | 0.0469 |                                     |              |                    |        |
| 384.9 | 7.2227(4)   | 12.5740(6)   | 13.2369(4)   | 1202.15(10) | 0.0466 |                                     |              |                    |        |
| 388.9 | 7.23406(25) | 12.5835(4)   | 13.17814(26) | 1199.60(6)  | 0.0408 |                                     |              |                    |        |
| 392.9 | 7.23277(24) | 12.5822(4)   | 13.16257(25) | 1197.85(6)  | 0.0420 |                                     |              |                    |        |
| 396.9 | 7.23082(24) | 12.5805(4)   | 13.15356(25) | 1196.54(6)  | 0.0433 |                                     |              |                    |        |
| 401.0 | 7.22866(25) | 12.5780(4)   | 13.14659(26) | 1195.31(6)  | 0.0439 | <b><i>P</i>31c dehydrated phase</b> |              |                    |        |
| 405.0 | 7.22788(25) | 12.5765(4)   | 13.14192(26) | 1194.62(6)  | 0.0430 | <i>a</i> / Å                        | <i>c</i> / Å | V / Å <sup>3</sup> | wRp    |
| 409.0 | 7.22880(26) | 12.5768(4)   | 13.13910(26) | 1194.54(6)  | 0.0395 | 6.9615(18)                          | 12.246(5)    | 513.95(29)         | 0.0430 |
| 413.0 | 7.23032(29) | 12.5768(5)   | 13.13426(27) | 1194.36(7)  | 0.0363 | 6.9640(50)                          | 12.2334(13)  | 513.80(7)          | 0.0395 |
| 417.0 | 7.2333(4)   | 12.5782(7)   | 13.1301(4)   | 1194.60(10) | 0.0362 | 6.9638(18)                          | 12.2297(5)   | 513.623(29)        | 0.0363 |
| 421.0 | 7.2368(7)   | 12.5787(12)  | 13.1257(6)   | 1194.82(18) | 0.0382 | 6.9634(10)                          | 12.22858(28) | 513.511(16)        | 0.0362 |
| 425.0 | 7.2393(18)  | 12.575(3)    | 13.1195(11)  | 1194.3(4)   | 0.0425 | 6.96327(7)                          | 12.22814(21) | 513.472(12)        | 0.0382 |
| 429.0 | 7.252(3)    | 12.554(6)    | 13.1125(22)  | 1193.8(8)   | 0.0477 | 6.96361(7)                          | 12.22789(20) | 513.512(11)        | 0.0425 |
| 433.0 | 7.285(4)    | 12.509(7)    | 13.090(6)    | 1192.8(11)  | 0.0462 | 6.96388(7)                          | 12.22709(21) | 513.520(11)        | 0.0477 |
| 437.0 |             |              |              |             |        | 6.96390(6)                          | 12.22628(19) | 513.488(10)        | 0.0462 |
| 441.0 |             |              |              |             |        | 6.96357(6)                          | 12.22522(19) | 513.394(10)        | 0.0468 |
| 445.0 |             |              |              |             |        | 6.96369(6)                          | 12.22480(19) | 513.395(10)        | 0.0462 |
| 449.0 |             |              |              |             |        | 6.96363(6)                          | 12.22402(19) | 513.353(10)        | 0.0459 |
| 453.0 |             |              |              |             |        | 6.96374(6)                          | 12.22329(19) | 513.338(10)        | 0.0458 |
| 457.0 |             |              |              |             |        | 6.96350(6)                          | 12.22218(18) | 513.257(10)        | 0.0445 |
| 461.0 |             |              |              |             |        | 6.96344(6)                          | 12.22143(18) | 513.215(10)        | 0.0442 |
| 465.0 |             |              |              |             |        | 6.96364(6)                          | 12.22088(18) | 513.222(10)        | 0.0440 |
| 469.0 |             |              |              |             |        | 6.96388(6)                          | 12.22033(18) | 513.235(10)        | 0.0440 |
| 473.0 |             |              |              |             |        | 6.96409(6)                          | 12.21980(18) | 513.243(10)        | 0.0438 |
| 476.6 |             |              |              |             |        | 6.96447(6)                          | 12.21950(18) | 513.287(10)        | 0.0443 |
| 480.8 |             |              |              |             |        | 6.96461(6)                          | 12.21877(18) | 513.277(10)        | 0.0436 |
| 485.0 |             |              |              |             |        | 6.96489(6)                          | 12.21824(18) | 513.295(10)        | 0.0433 |
| 489.1 |             |              |              |             |        | 6.96512(6)                          | 12.21768(18) | 513.306(9)         | 0.0430 |
| 493.1 |             |              |              |             |        | 6.96538(6)                          | 12.21729(18) | 513.329(9)         | 0.0430 |
| 497.0 |             |              |              |             |        | 6.96561(6)                          | 12.21675(18) | 513.339(9)         | 0.0429 |
| 500.7 |             |              |              |             |        | 6.96585(6)                          | 12.21621(18) | 513.353(9)         | 0.0425 |
| 500.1 |             |              |              |             |        | 6.96612(6)                          | 12.21574(18) | 513.373(9)         | 0.0423 |
| 500.0 |             |              |              |             |        | 6.96611(6)                          | 12.21553(18) | 513.362(9)         | 0.0423 |
| 500.0 |             |              |              |             |        | 6.96616(6)                          | 12.21556(18) | 513.371(10)        | 0.0427 |
